# Supplementary material for: Identification of Thermophilic Aerobic Sporeformers in Bedding Material of Compost-Bedded Dairy Cows Using Microbial and Molecular Methods
Source: MDPI journal article supplement (doi:10.3390/ani11102890), 2021-10-04
Supplement: s1 [file s1]

**Table S1.** Least-square means of amount of thermophilic aerobic sporeformers (TAS; log10 cfu/g bedding material) and TAS concentration by season, lactation status and compost-bedded pack barn (CBP) group (standard errors in brackets).

| Trait                                    | Season                      |                             |                             |                             | Lactation status |                 | CBP group        |                  |                  |                  |
|------------------------------------------|-----------------------------|-----------------------------|-----------------------------|-----------------------------|------------------|-----------------|------------------|------------------|------------------|------------------|
|                                          | Spring                      | Summer                      | Autumn                      | Winter                      | Dry              | Lactating       | 1                | 2                | 3                | 4                |
| Amount of TAS                            | 3.79 <sup>a</sup><br>(0.26) | 3.62 <sup>a</sup><br>(0.37) | 3.79 <sup>a</sup><br>(0.26) | 5.31 <sup>b</sup><br>(0.31) | 4.37<br>(0.42)   | 4.00<br>(0.28)  | 4.39<br>(0.43)   | 3.72<br>(0.50)   | 3.64<br>(0.61)   | 4.37<br>(0.43)   |
| <i>Aneurinibacillus thermoaerophilus</i> | 7.14<br>(5.11)              | 0.00<br>(7.23)              | 0.00<br>(5.11)              | 10.90<br>(5.90)             | 8.17<br>(5.10)   | 3.17<br>(3.40)  | 0.00<br>(5.17)   | 9.52<br>(5.97)   | 0.00<br>(7.31)   | 8.17<br>(5.17)   |
| <i>Bacillus licheniformis</i>            | 80.74<br>(11.46)            | 65.63<br>(16.21)            | 72.92<br>(11.46)            | 62.61<br>(13.23)            | 72.33<br>(11.06) | 71.59<br>(7.37) | 75.00<br>(11.30) | 59.23<br>(13.05) | 83.33<br>(15.99) | 72.33<br>(11.30) |
| <i>Geobacillus thermodenitrificans</i>   | 0.00<br>(3.61)              | 12.50<br>(5.11)             | 0.00<br>(3.61)              | 5.13<br>(4.17)              | 3.85<br>(4.08)   | 2.78<br>(2.72)  | 0.00<br>(4.06)   | 8.33<br>(4.69)   | 0.00<br>(5.75)   | 3.85<br>(4.06)   |
| <i>Laceyella sacchari</i>                | 5.49<br>(6.56)              | 0.00<br>(9.28)              | 8.33<br>(6.56)              | 18.80<br>(7.58)             | 9.18<br>(6.82)   | 8.33<br>(4.55)  | 10.42<br>(6.84)  | 0.00<br>(7.90)   | 16.67<br>(9.67)  | 9.18<br>(6.84)   |
| <i>Thermoactinomyces vulgaris</i>        | 6.63<br>(7.88)              | 21.88<br>(11.15)            | 15.63<br>(7.88)             | 0.00<br>(9.10)              | 4.55<br>(7.98)   | 12.73<br>(5.32) | 11.46<br>(7.75)  | 22.92<br>(8.95)  | 0.00<br>(10.96)  | 4.55<br>(7.75)   |
| <i>Ureibacillus thermosphaericus</i>     | 0.00<br>(2.09)              | 0.00<br>(2.95)              | 3.13<br>(2.09)              | 2.56<br>(2.41)              | 1.92<br>(2.04)   | 1.39<br>(1.36)  | 3.13<br>(2.12)   | 0.00<br>(2.45)   | 0.00<br>(3.00)   | 1.92<br>(2.12)   |

<sup>a, b</sup> Different letters represent significant differences ( $P < 0.05$ ).

**Table S2.** Regression coefficients of days between complete renewal of bedding and sample date (Days), moisture content (Mc), bedding temperature (Tbed), temperature 1.30 m (Thigh) and 0.10 m (Tdown) above bedding material, relative humidity 1.30 m (RHhigh) and 0.10 m (RHdown) above bedding material, ambient temperature (Tamb), and bedded area/cow on amount of thermophilic aerobic sporeformers (TAS) and TAS concentrations (standard errors in brackets).

| Trait                                    | Days            | Mc               | Tbed            | Thigh           | RHhigh          | Tdown           | RHdown          | Tamb            | Bedded area/cow |
|------------------------------------------|-----------------|------------------|-----------------|-----------------|-----------------|-----------------|-----------------|-----------------|-----------------|
| Amount of TAS                            | -0.01<br>(0.00) | -0.08*<br>(0.03) | -0.03<br>(0.02) | -0.03<br>(0.03) | 0.03*<br>(0.01) | -0.03<br>(0.03) | 0.04*<br>(0.01) | -0.03<br>(0.02) | 0.05<br>(0.06)  |
| <i>Aneurinibacillus thermoaerophilus</i> | 0.01<br>(0.04)  | 0.50<br>(0.42)   | -0.49<br>(0.22) | -0.18<br>(0.32) | -0.04<br>(0.16) | -0.19<br>(0.33) | -0.06<br>(0.17) | -0.13<br>(0.30) | 1.28<br>(0.68)  |
| <i>Bacillus licheniformis</i>            | 0.00<br>(0.08)  | 1.33<br>(0.84)   | 0.04<br>(0.56)  | -0.20<br>(0.69) | -0.25<br>(0.34) | -0.21<br>(0.69) | -0.24<br>(0.36) | -0.08<br>(0.64) | -0.02<br>(1.65) |
| <i>Geobacillus thermodenitrificans</i>   | 0.03<br>(0.03)  | -0.12<br>(0.34)  | -0.05<br>(0.21) | 0.43<br>(0.22)  | -0.01<br>(0.13) | 0.44<br>(0.22)  | -0.03<br>(0.13) | 0.37<br>(0.21)  | -0.12<br>(0.61) |
| <i>Laceyella sacchari</i>                | -0.08<br>(0.04) | -0.90<br>(0.51)  | 0.00<br>(0.35)  | -0.45<br>(0.40) | 0.44*<br>(0.17) | -0.46<br>(0.41) | 0.46*<br>(0.18) | -0.47<br>(0.37) | -0.12<br>(1.02) |
| <i>Thermoactinomyces vulgaris</i>        | 0.06<br>(0.06)  | -0.44<br>(0.68)  | 0.39<br>(0.40)  | 0.50<br>(0.49)  | -0.23<br>(0.25) | 0.52<br>(0.50)  | -0.23<br>(0.26) | 0.42<br>(0.46)  | -1.00<br>(1.19) |
| <i>Ureibacillus thermosphaericus</i>     | -0.02<br>(0.01) | -0.38*<br>(0.13) | 0.10<br>(0.10)  | -0.10<br>(0.12) | 0.09<br>(0.06)  | -0.10<br>(0.13) | 0.10<br>(0.06)  | -0.11<br>(0.11) | -0.02<br>(0.31) |

\* Significant regression coefficient ( $P < 0.05$ ).
